# Supplementary material for: Reconstitution and characterization of the unconventional splicing of XBP1u mRNA in vitro
Source: PubMed Central journal article supplement — Nucleic Acids Res. 2011 Mar 11;39(12):5245–54. doi: 10.1093/nar/gkr132 (PMC3130286; doi:10.1093/nar/gkr132), 2011-03-11

## SUPPLEMENTAL DATA

### SUPPLEMENTAL FIGURES

**Figure S1.** Mechanism of *HAC1* mRNA splicing. *HAC1* mRNA is cleaved by Ire1, which leaves a 2', 3'-cyclic phosphate terminus and a hydroxyl terminus at the cleavage sites. Two exons are then joined by yeast tRNA ligase (Rlg1). For this purpose, Rlg1 performs four reactions. The phosphodiesterase activity of Rlg1 hydrolyzes the 2', 3'-cyclic phosphate terminus at the 3'-end of the 5'-exon, yielding 3'-hydroxyl, 2'-phosphatidyl terminus. The polynucleotide kinase activity of Rlg1 promotes the phosphorylation of the hydroxyl terminus at the 5'-end of the 3'-exon with phosphate derived from the  $\gamma$ -position of GTP. Rlg1 then adenylates itself using ATP and transfers its AMP to the phosphorylated 5'-end of the 3'-exon. Following these reactions, Rlg1 ligates two exons by its ligase activity (1, 2, 3, 4). The 2'-phosphate that remains after the reactions by Rlg1 is removed by a 2'-phosphotransferase Tpt1 (5).

**Figure S2.** Nucleotide requirements for the ligase activity. After cleaving the *XBPIu* RNA with IRE1 $\alpha$ , the cleaved product was purified and subjected to *in vitro* splicing reaction with the two Mono Q fractions (fraction 5 and fraction 8). The samples were then subjected to the splicing assay and their relative ligation activity was calculated as described in Material and Methods. The activity observed in the presence of both 1.25 mM ATP and 0.75 mM GTP was taken as 100%. Error bars indicate standard deviations from the average of three independent experiments.

**Figure S3.** The ligase activity is heat-labile. (A) Rabbit erythrocyte lysate (REL) was heated at 96°C for 15 min, cooled on ice and subjected to the splicing assay. Lane 1: assay with untreated REL. Lane 2: assay with heated REL. U and S indicate the positions of the RT-PCR products representing the *XBPIu* and *XBPIs* RNAs. (B) Two Mono Q fractions (fraction 5 and fraction 8) were heated at 96°C for 15 min, cooled on ice and subjected to the splicing assay. The combinations of two Mono Q fractions in the assays shown in this panel are: untreated fraction 5 (lane 3), untreated fraction 8 (lane 4), heated fraction 5 (lane 5), heated fraction 8 (lane 6), untreated fraction 5 and untreated fraction 8 (lane 7), heated fraction 5 and untreated fraction 8 (lane 8), untreated fraction 5 and heated fraction 8 (lane 9) and heated fraction 5 and heated fraction 8 (lane 10).

**Figure S4.** Schematic representation of *XBPIu* mRNA and the model substrate SL85. (Left) Predicted secondary structure of human *XBPIu* mRNA in the region surrounding the IRE1 $\alpha$  cleavage sites (6). (Right) The GC sequences except the two GC sequences at the IRE1 $\alpha$  cleavage sites of the *XBPIu* mRNA fragment were altered in the RNA substrate (SL85), in a manner that should retain the secondary structure of the RNA. The changes made in SL85 were highlighted with red. As far as we examined, these changes did not affect the splicing reaction: SL85 was properly cleaved and re-ligated in our *in vitro* reaction to yield the final spliced product (date not shown). Triangles mark the sites of specific cleavage by IRE1 $\alpha$ .

## REFERENCES

1. Gonzalez,T.N., Sidrauski,C., Dorfler,S. and Walter,P. (1999) Mechanism of non-spliceosomal mRNA splicing in the unfolded protein response pathway. *EMBO J.*, **18**, 3119-3132.
2. Greer,C.L., Peebles,C.L., Gegenheimer,P. and Abelson,J. (1983) Mechanism of action of a yeast RNA ligase in tRNA splicing. *Cell*, **32**, 537-546.
3. Phizicky,E.M., Schwartz,R.C. and Abelson,J. (1986) Saccharomyces cerevisiae tRNA ligase. purification of the protein and isolation of the structural gene. *J. Biol. Chem.*, **261**, 2978-2986.
4. Belford,H.G., Westaway,S.K., Abelson,J. and Greer,C.L. (1993) Multiple nucleotide cofactor use by yeast ligase in tRNA splicing. evidence for independent ATP- and GTP-binding sites. *J. Biol. Chem.*, **268**, 2444-2450.
5. Culver,G.M., McCraith,S.M., Consaul,S.A., Stanford,D.R. and Phizicky,E.M. (1997) A 2'-phosphotransferase implicated in tRNA splicing is essential in saccharomyces cerevisiae. *J. Biol. Chem.*, **272**, 13203-13210.
6. Calton,M., Zeng,H., Urano,F., Till,J.H., Hubbard,S.R., Harding,H.P., Clark,S.G. and Ron,D. (2002) IRE1 couples endoplasmic reticulum load to secretory capacity by processing the XBP-1 mRNA. *Nature*, **415**, 92-96.

# Figure S1

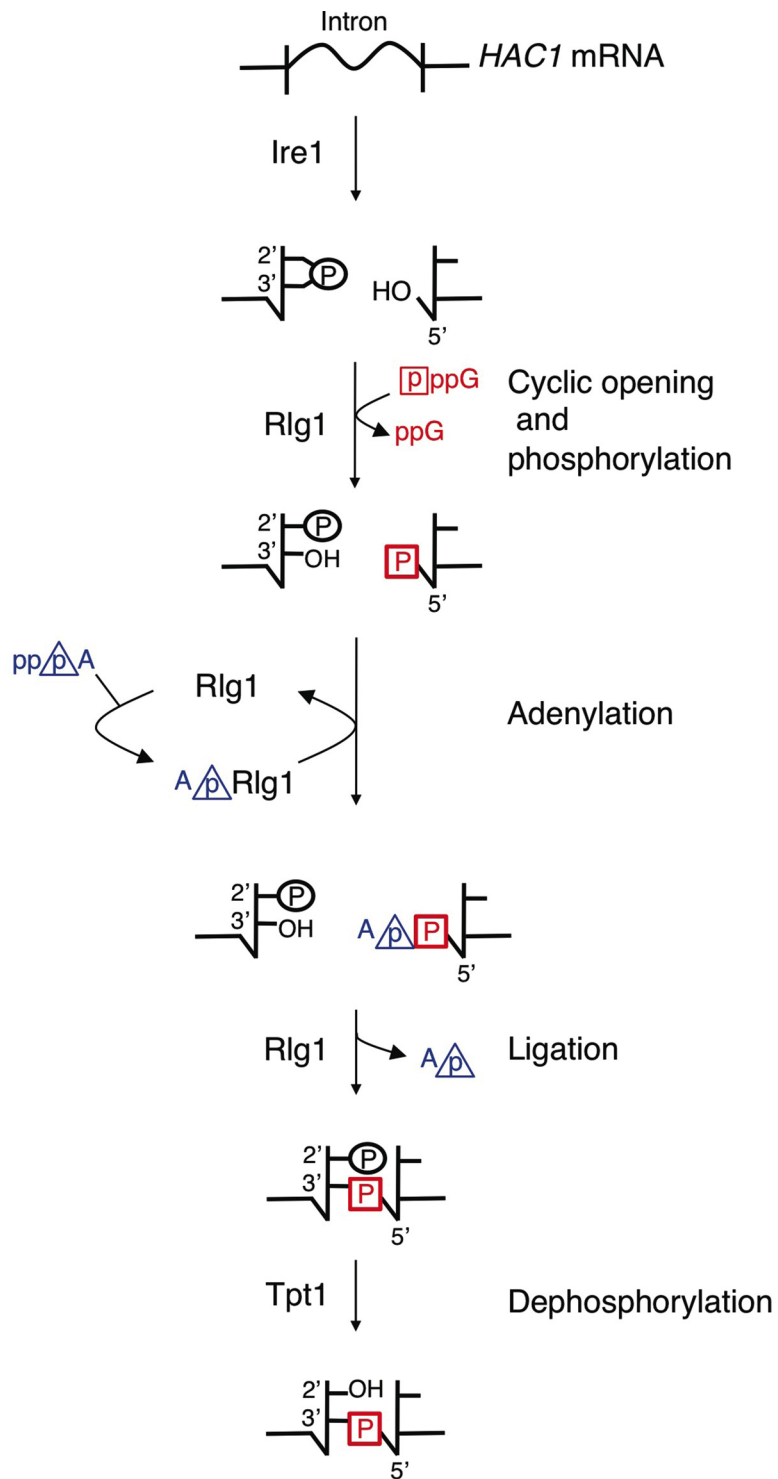

**Figure S2**

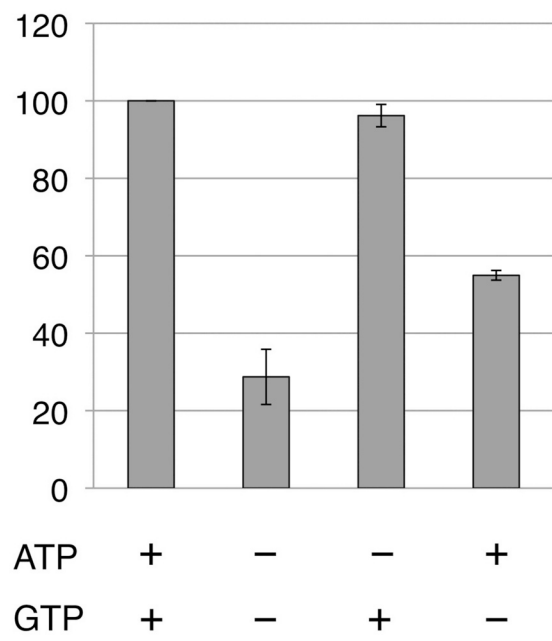

**Figure S3**

**A**

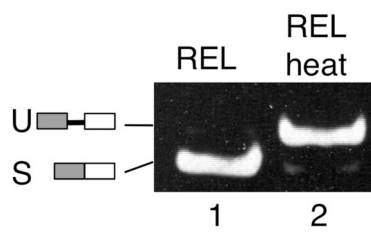

**B**

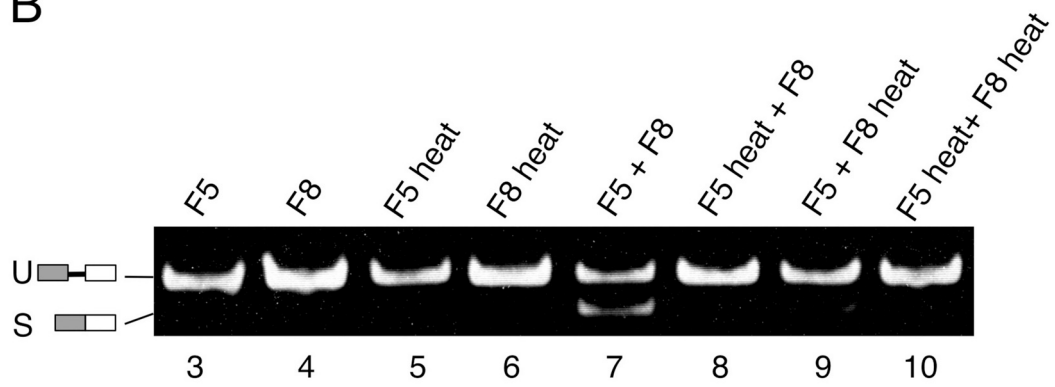

Supplement: supp_gkr132_Shinya-supplemental.pdf [file supp_gkr132_Shinya-supplemental.pdf]
